# Supplementary material for: Dynamics and thermal sensitivity of ballistic and non-ballistic feeding in salamanders
Source: Oxford University Press journal article supplement (doi:10.1242/jeb.127407), 2015-01-01
Supplement: jeb127407supp.pdf [file jeb127407supp.pdf]

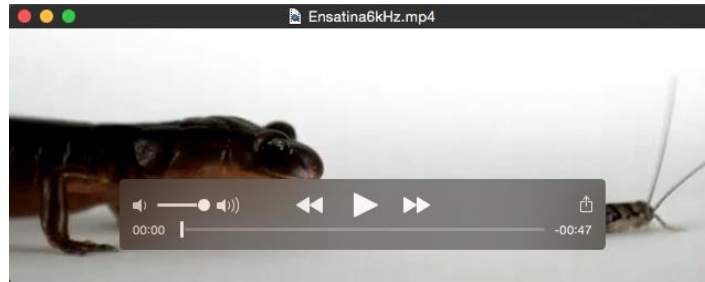

Movie 1. Movie of *E. eschscholtzii* demonstrating ballistic tongue projection to capture a cricket at 20°C. This exceptionally long projection of 22 mm or 40% of SVL was completed in 10 ms, while retraction required approximately 40 ms. Note the forward lunge of the salamander and its large tongue pad. Movie was captured at 6000 Hz and plays back at 30 Hz or 1/200 actual speed.

## Table S1

[Click here to Download Table S1](#)

## Table S2

[Click here to Download Table S2](#)

## Table S3

[Click here to Download Table S3](#)

## Table S4

[Click here to Download Table S4](#)
